# Supplementary material for: Solvent and catalyst-free synthesis of polyphosphates
Source: Royal Society of Chemistry journal article supplement (doi:10.1039/b602462a), 2006-01-01
Supplement: b602462a.pdf [file b602462a.pdf]

Figure 1 presents the IR spectra of polymers P<sub>2</sub>, P<sub>3</sub> and P<sub>5</sub>.

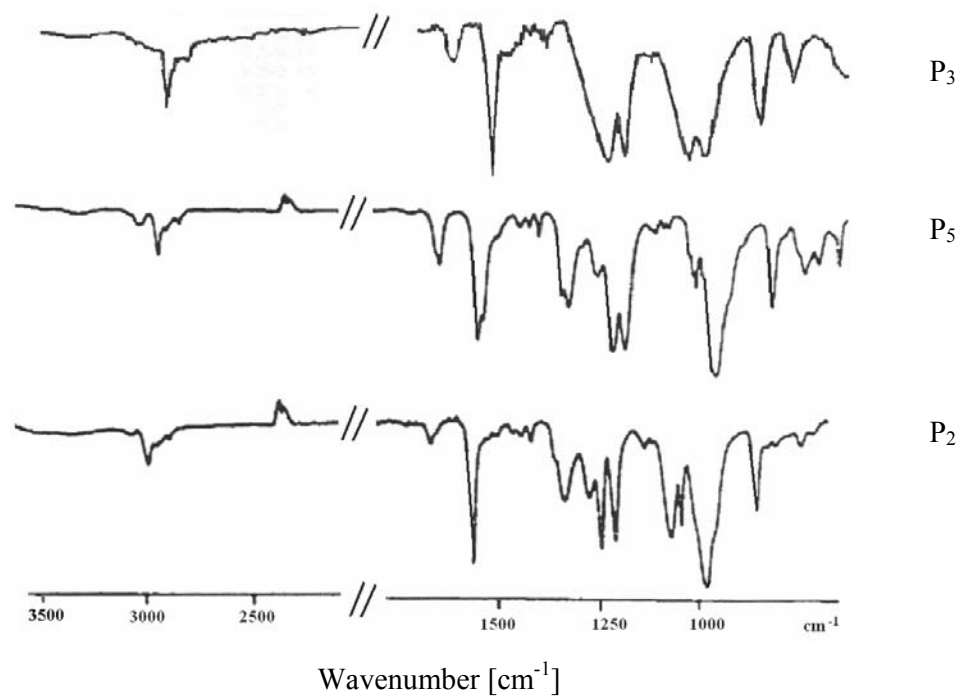

Figure 1. The IR spectra of the polyphosphates P<sub>2</sub>, P<sub>3</sub> and P<sub>5</sub>

Representative <sup>1</sup>H-NMR spectra of P<sub>1</sub> and P<sub>5</sub> are shown in Figure 2.

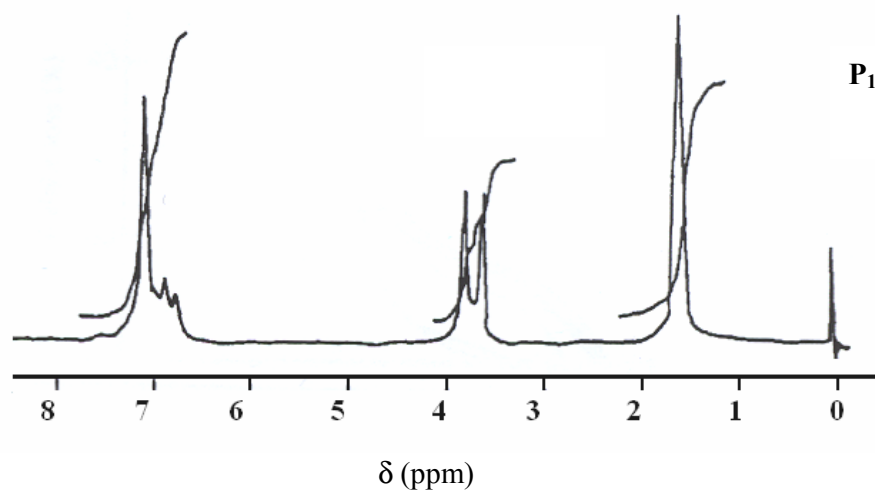

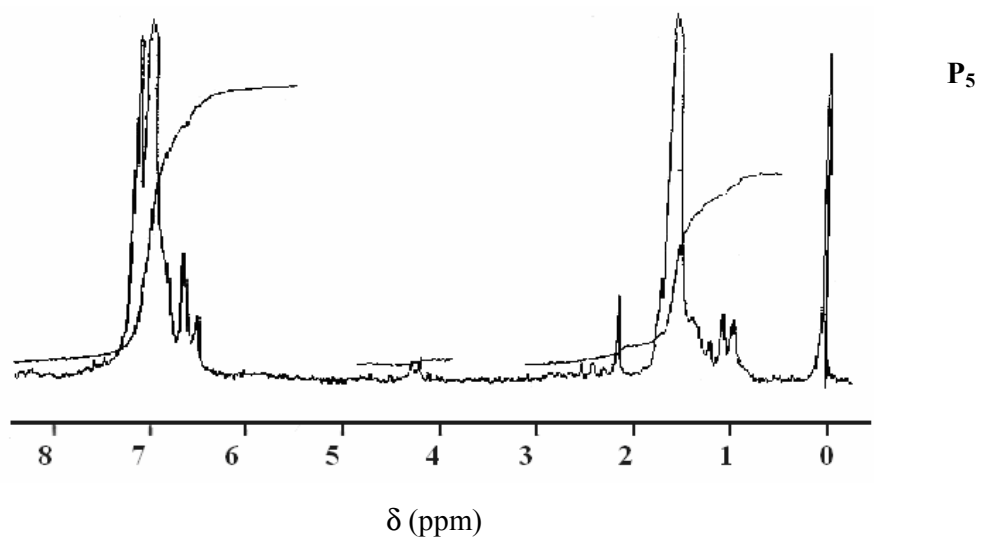

Figure 2. The  $^1\text{H-NMR}$ -spectrum of polyphosphates  $\text{P}_1$  and  $\text{P}_5$

X-ray diffraction patterns of  $\text{P}_5$ ,  $\text{P}_6$  and  $\text{P}_7$  polyphosphates are shown in Figure 3.

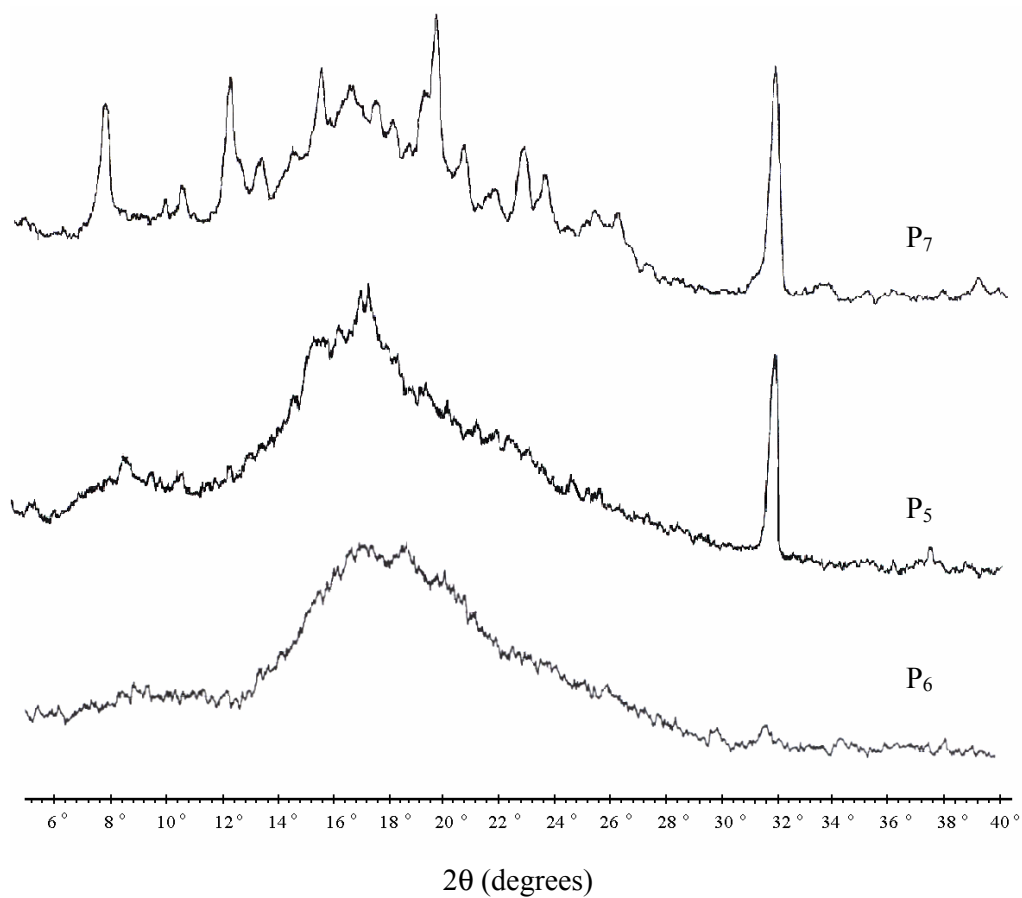

Figure 3. X-ray diffraction patterns of polyphosphates P<sub>5</sub>, P<sub>6</sub> and P<sub>7</sub>
